# Supplementary material for: Supramolecular assembly from decavanadate anion and decamethylcucurbit[5]uril
Source: Royal Society of Chemistry journal article supplement (doi:10.1039/b817537n), 2008-12-17
Supplement: b817537n.pdf [file b817537n.pdf]

## Supporting Information

# Supramolecular Assembly from Decavanadate Anion and Decamethylcucurbit[5]uril

Jing-Xiang Lin, Jian Lü, Rong Cao,\* Jiu-Tong Chen

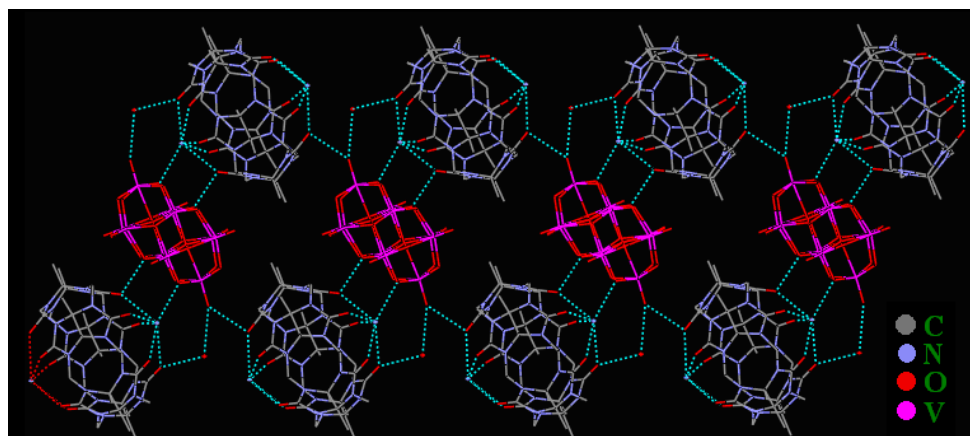

Figure 1S. Supramolecular cingulum constructed from the sandwich-type units through hydrogen bonding interaction in **1**

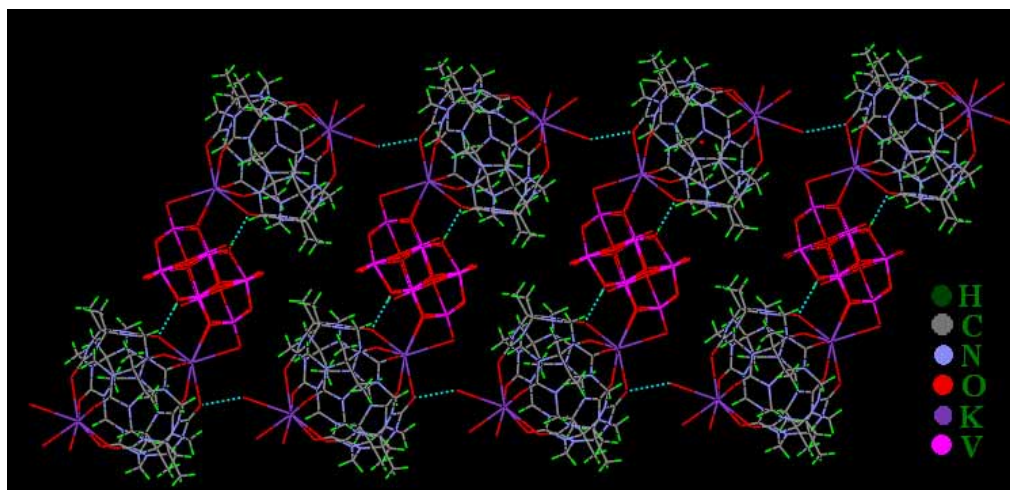

Figure 2S. A view showing sandwich-type subunit to form 1D supramolecular strap based on H-bonds (in dashed line) in **2**

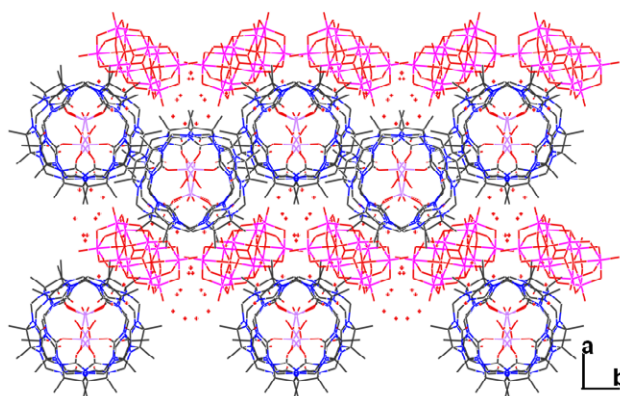

Figure 3S. Packing structure of **3** along the *c*-axis

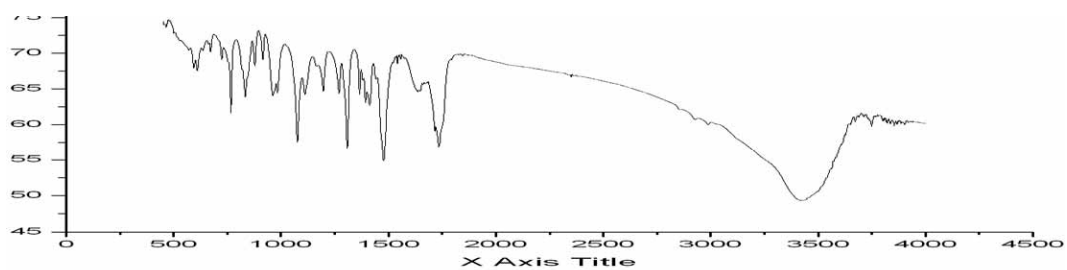

Figure 4S. IR spectrum of compound **1**.

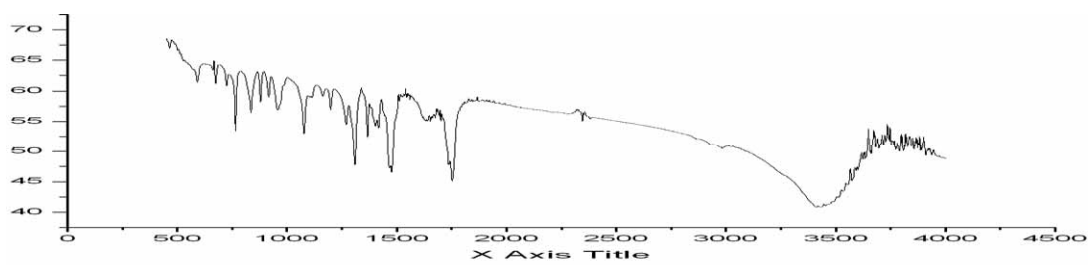

Figure 5S. IR spectrum of compound **2**.

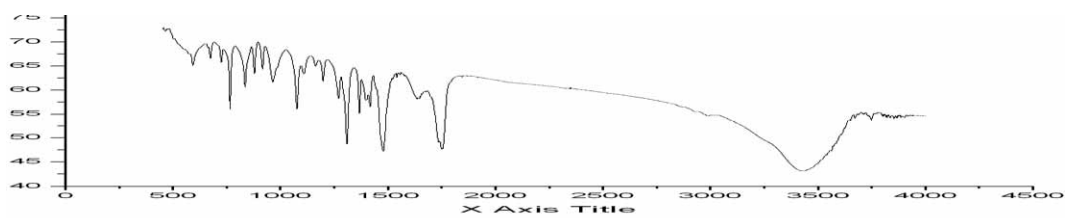

Figure 6S. IR spectrum of compound **3**.
